# Supplementary material for: Synthesis and characterization of poly(phenylene thioether)s containing pyrimidine units exhibiting high transparency, high refractive indices, and low birefringence
Source: Royal Society of Chemistry journal article supplement (doi:10.1039/c5tc00886g), 2015-01-01
Supplement: c5tc00886g1.pdf [file c5tc00886g1.pdf]

## **Supporting information**

### **Synthesis and characterization of poly(phenylene thioether)s containing pyrimidine units exhibiting high transparency, high refractive indices, and low birefringence**

Kazuhiro Nakabayashi, Takayuki Imai, Mao-Chun Fu, Shinji Ando, Tomoya Higashihara, and Mitsuru Ueda

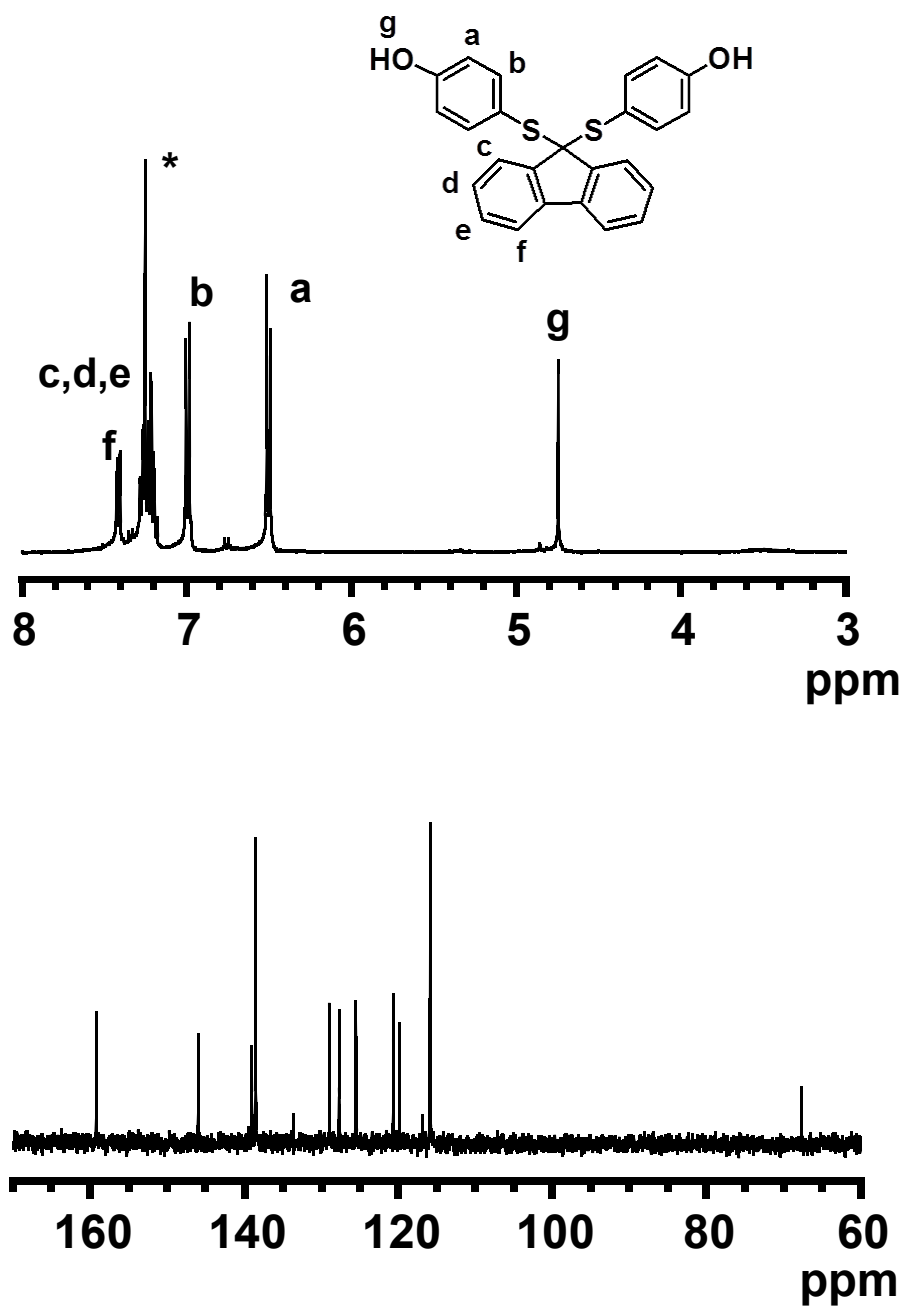

**Fig. S1**  $^1\text{H}$  (CDCl<sub>3</sub>) and  $^{13}\text{C}$  NMR (DMSO-*d*<sub>6</sub>) spectra of **M1**. The residual CHCl<sub>3</sub> peak is marked.

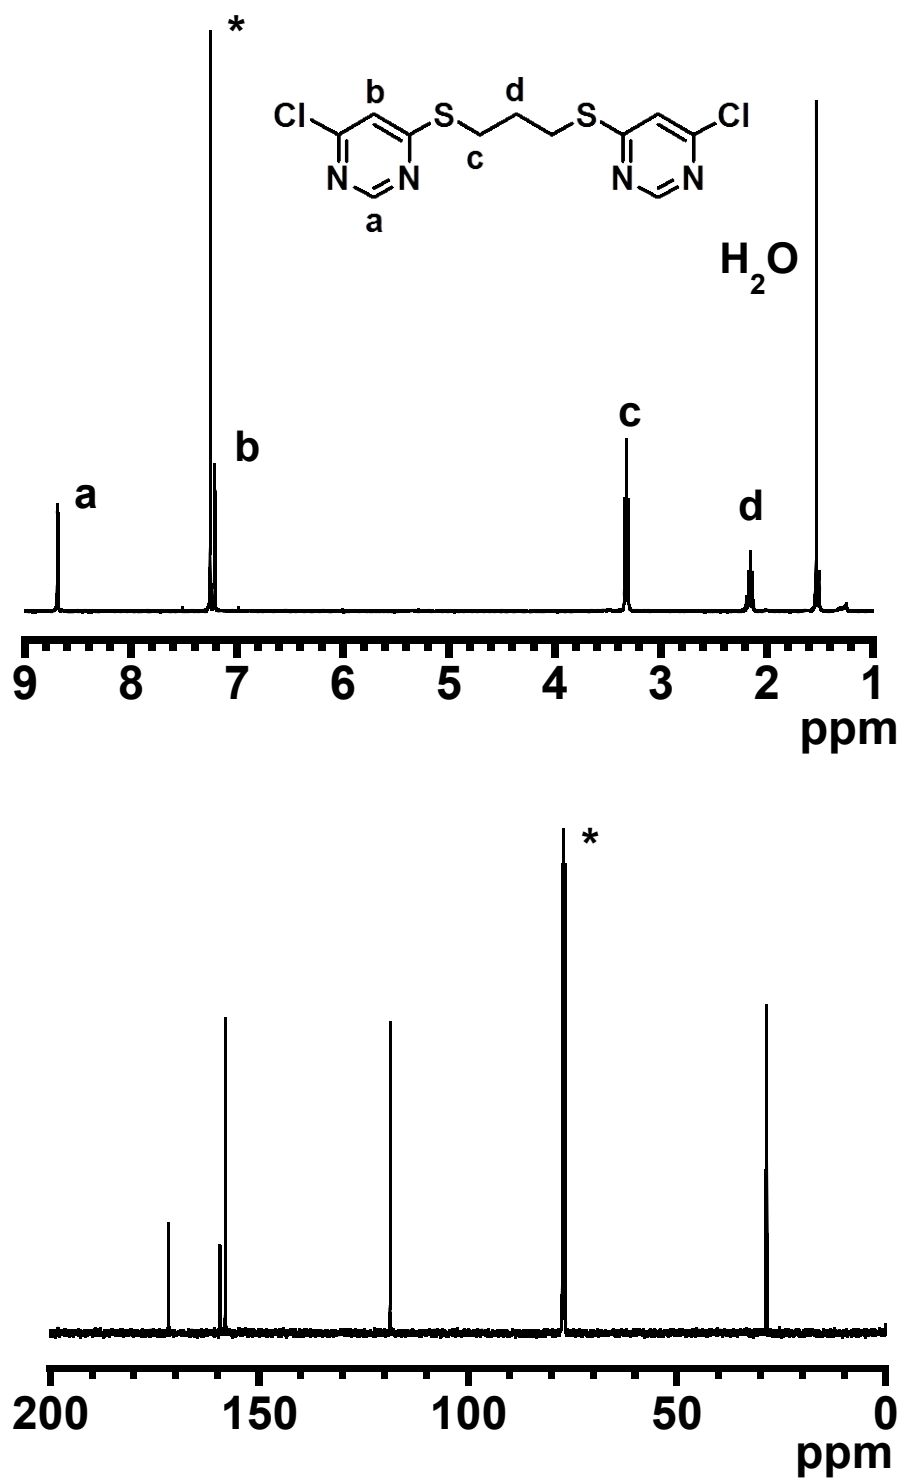

**Fig. S2**  $^1\text{H}$  and  $^{13}\text{C}$  NMR spectra of **M2** in  $\text{CDCl}_3$ . The residual  $\text{CHCl}_3$  peak is marked.

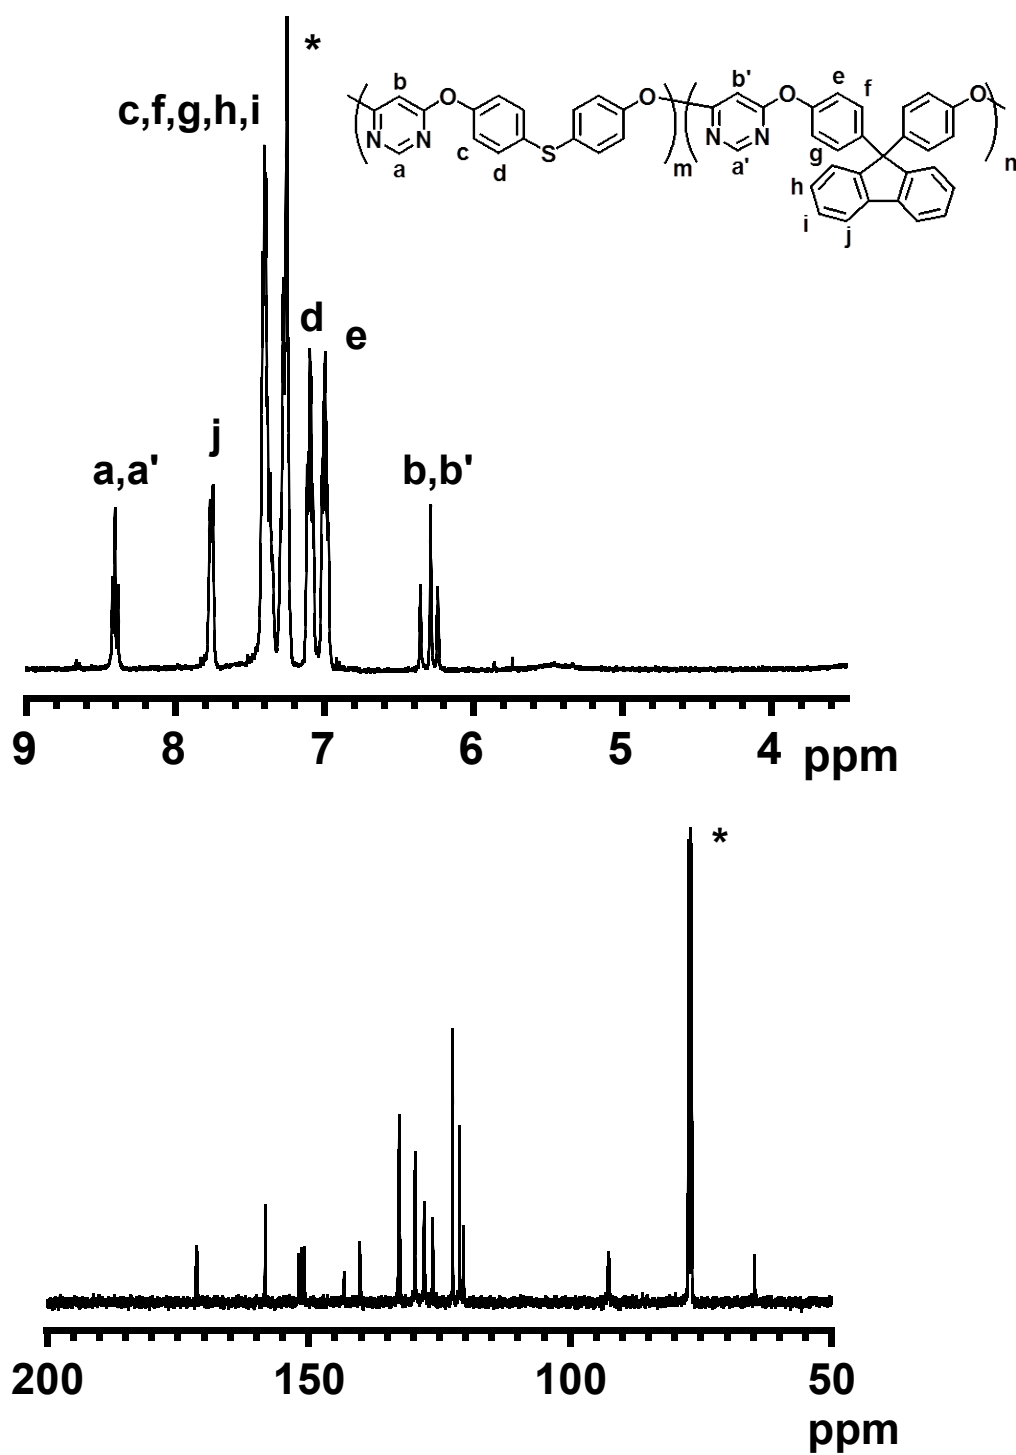

**Fig. S3**  $^1\text{H}$  and  $^{13}\text{C}$  NMR spectrum of **P2** in  $\text{CDCl}_3$ . The residual  $\text{CHCl}_3$  peak is marked.

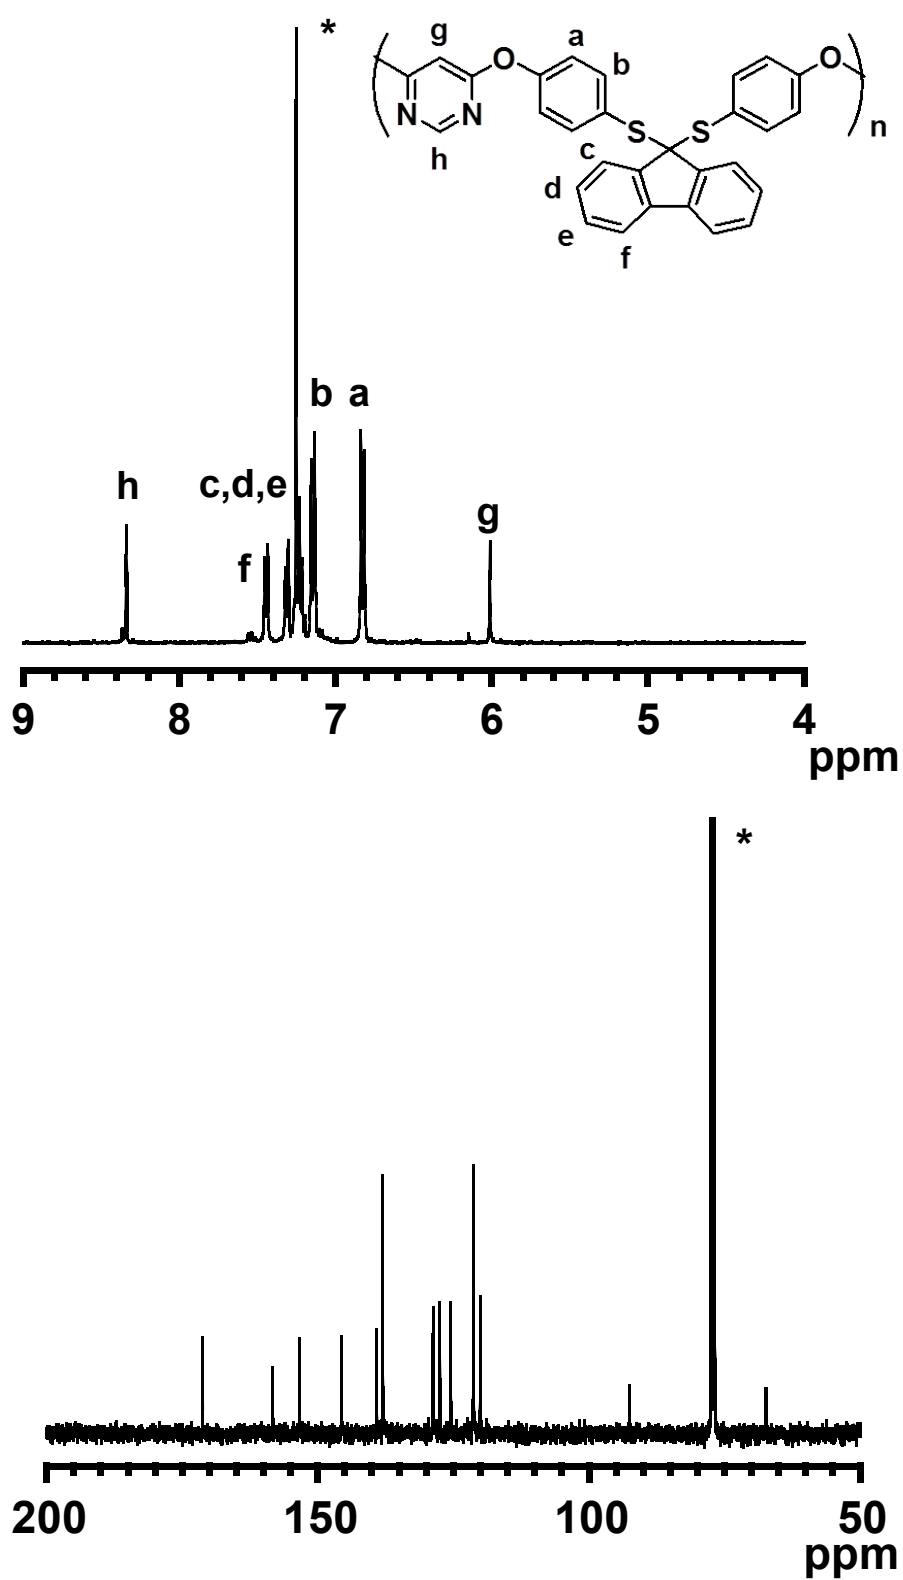

**Fig. S4**  $^1\text{H}$  and  $^{13}\text{C}$  NMR spectrum of **P3** in  $\text{CDCl}_3$ . The residual  $\text{CHCl}_3$  peak is marked.

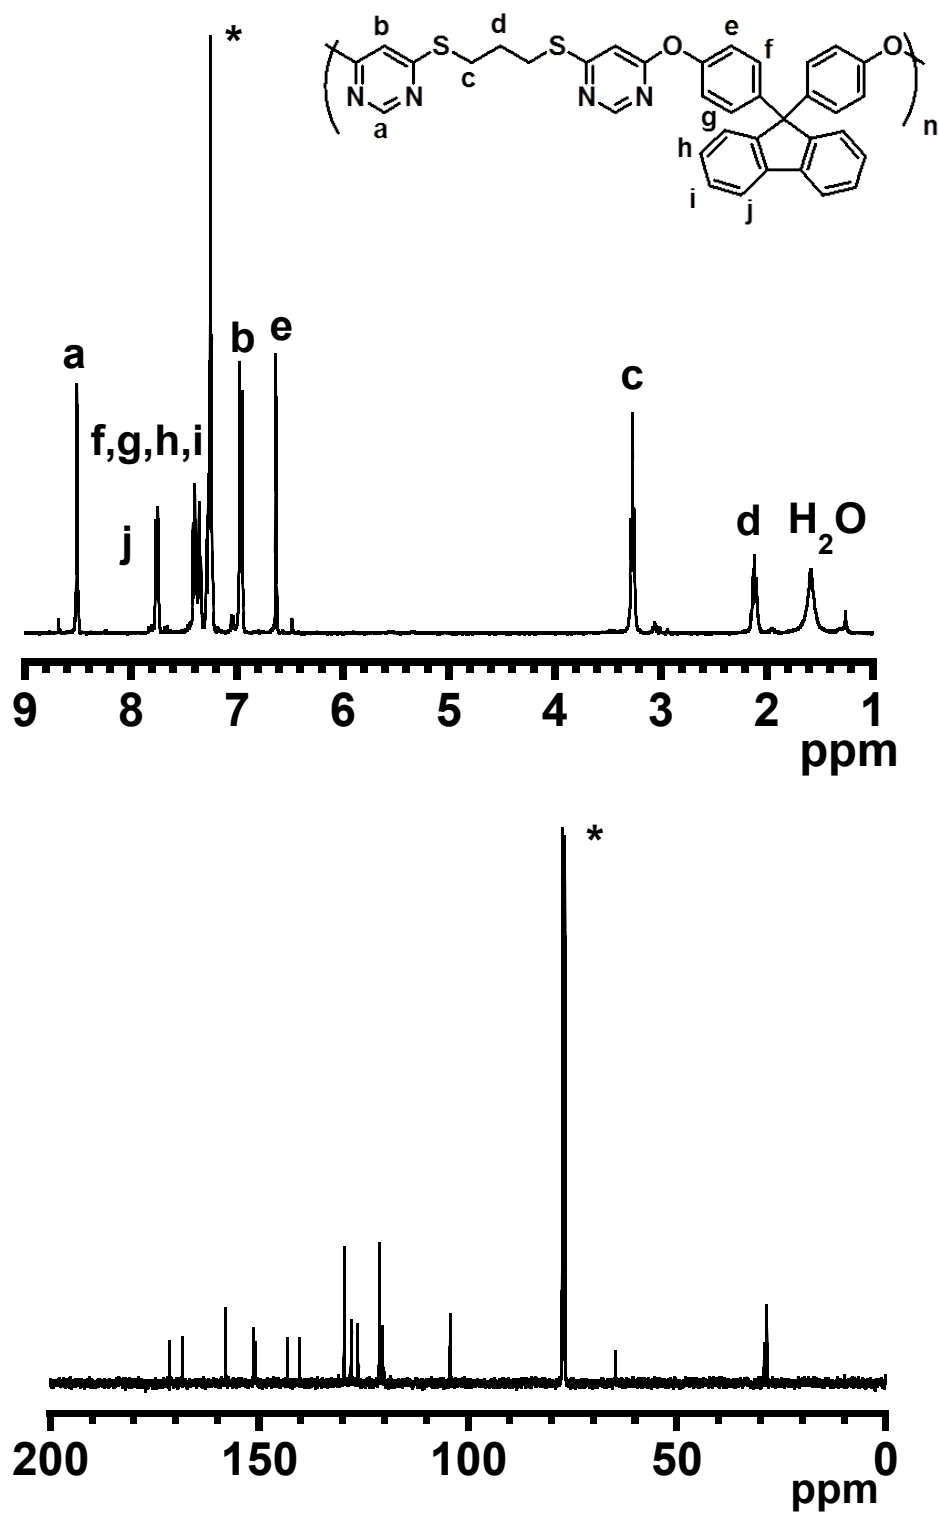

**Fig. S5**  $^1\text{H}$  and  $^{13}\text{C}$  NMR spectrum of **P4** in  $\text{CDCl}_3$ . The residual  $\text{CHCl}_3$  peak is marked.

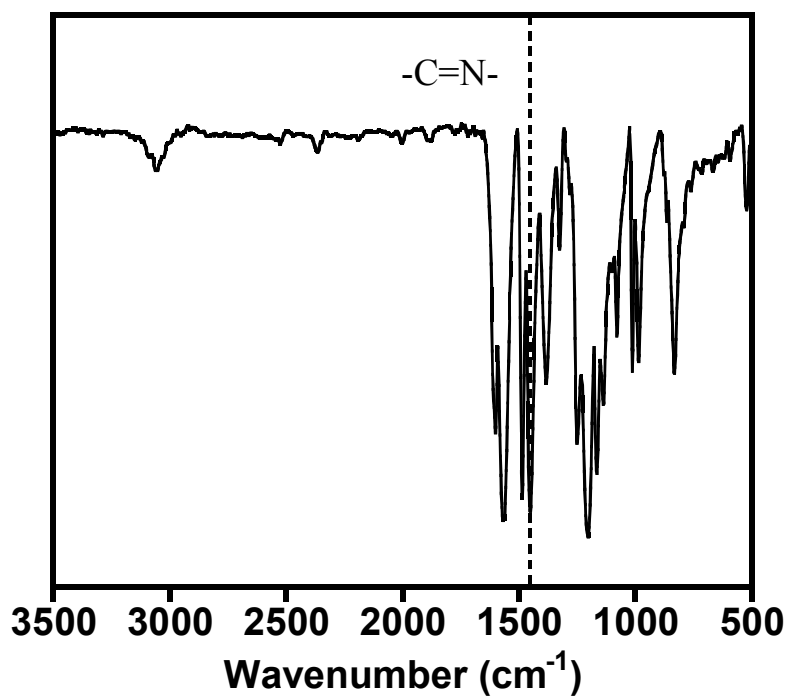

**Figure S6.** FT-IR spectrum of **P1**.

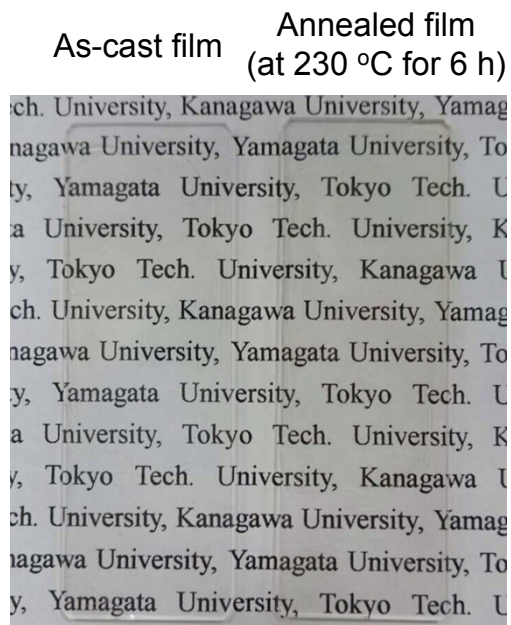

**Figure S7.** Images of as-cast and annealed **P1** films.

**Table S1.** Polymerization results of **P2**.<sup>a</sup>

| Run | Temp (°C) | Yield (%) | $M_n (M_w/M_n)^b$ | Color of products |
|-----|-----------|-----------|-------------------|-------------------|
| 1   | 100       | 93        | 104,000 (2.11)    | white             |
| 2   | 80        | 92        | 92,000 (2.07)     | white             |
| 3   | 60        | 97        | 56,000 (1.60)     | white             |

<sup>a</sup>Polymerization was carried out using 3.0 equivalent of  $K_2CO_3$ . <sup>b</sup>Measured by SEC using polystyrene standards in chloroform.

**Table S2.** Polymerization results of **P3**.<sup>a</sup>

| Run            | Temp. (°C) | Yield (%) | $M_n (M_w/M_n)^b$ | Color of products |
|----------------|------------|-----------|-------------------|-------------------|
| 1              | 100        | 68        | 4,000 (1.57)      | red               |
| 2              | 80         | 94        | 7,200 (2.32)      | yellow            |
| 3              | 60         | 84        | 31,000 (1.90)     | yellow            |
| 4 <sup>c</sup> | 60         | 97        | 38,000 (2.04)     | white             |

<sup>a</sup>Polymerization was carried out using 3.0 equivalent of  $K_2CO_3$ . <sup>b</sup>Measured by SEC using polystyrene standards in chloroform. <sup>c</sup>Using 2.2 equivalent of  $K_2CO_3$ .

**Table S3.** Polymerization results of **P4**.<sup>a</sup>

| Run | Temp (°C) | Yield (%) | $M_n (M_w/M_n)^b$ | Color of products |
|-----|-----------|-----------|-------------------|-------------------|
| 1   | 120       | 98        | 55,000 (1.89)     | white             |
| 2   | 100       | 88        | 58,000 (2.04)     | white             |
| 3   | 80        | 87        | 11,000 (1.75)     | white             |

<sup>a</sup>Polymerization was carried out using 3.0 equivalent of  $K_2CO_3$ . <sup>b</sup>Measured by SEC using polystyrene standards in chloroform.
